# Supplementary material
Source: Springer Nature journal article supplement (https://www.springermedizin.de/resource/supplementary/12936_2011_1729_MOESM1_ESM.pdf/9541586)

Uganda

Tanzania

DR Congo

Burundi

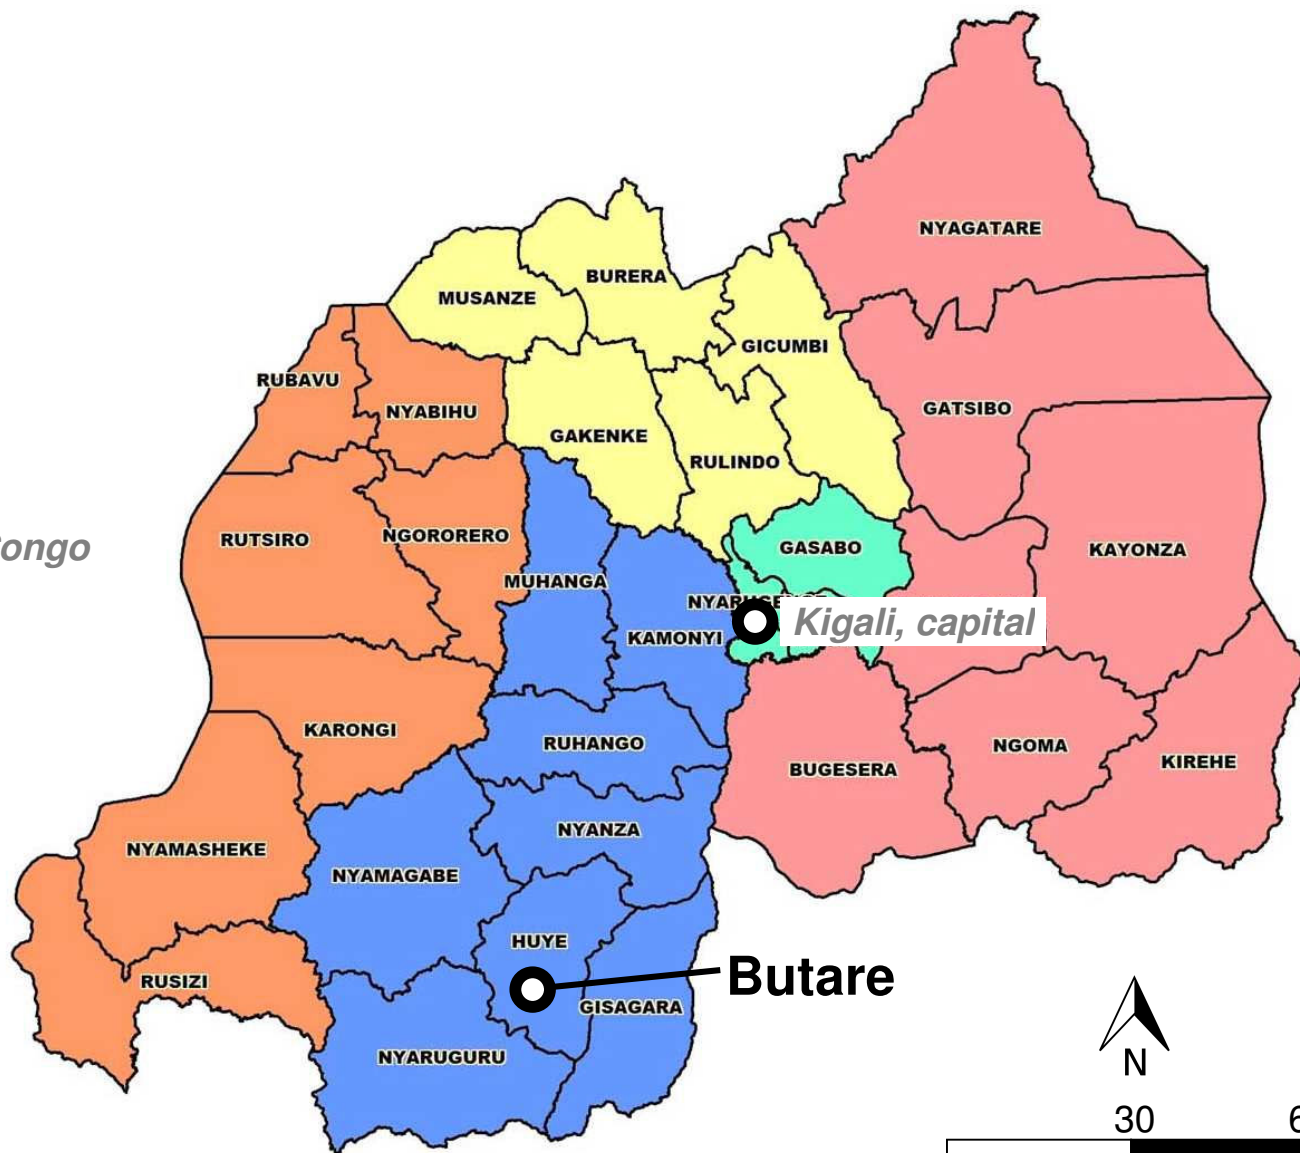

Kigali, capital

Butare

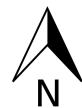

30

60

Kilometers

Supplement: MOESM1 [file 9541586]
